# Supplementary material for: HIV-1 Transmission during Early Infection in Men Who Have Sex with Men: A Phylodynamic Analysis
Source: PubMed Central journal article supplement (PMC3858227; doi:10.1371/journal.pmed.1001568), 2013-12-10

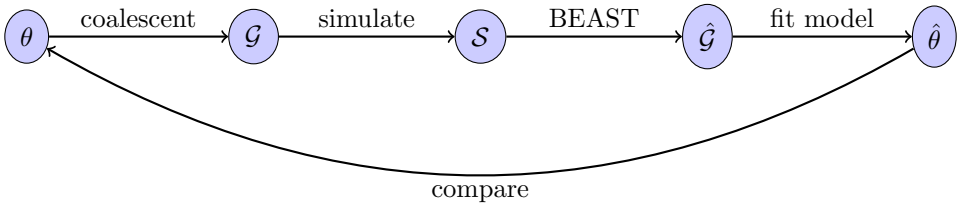

Supplement: pmed.1001568.s015.pdf [file pmed.1001568.s015.pdf]
