# Supplementary material for: HIV-1 Transmission during Early Infection in Men Who Have Sex with Men: A Phylodynamic Analysis
Source: PubMed Central journal article supplement (PMC3858227; doi:10.1371/journal.pmed.1001568), 2013-12-10
Supplement: pmed.1001568.s020.pdf [file pmed.1001568.s020.pdf]

| Free parameters            | EHI TF   | Diagnosed TF | $\Delta \ln(\mathcal{L})$ | AIC          |
|----------------------------|----------|--------------|---------------------------|--------------|
| $\beta_c, \delta, \beta_a$ | 0.431024 | 0.508944     | 0                         | 24448.896273 |
| $\beta_c, \beta_a$         | 0.430984 | 0.508803     | -0.004635                 | 24446.905544 |
| $\beta_c, \delta$          | 0.500422 | 0.531187     | -28.160443                | 24503.21716  |
| $\beta_c$                  | 0.500496 | 0.531007     | -28.162529                | 24501.221332 |
| $\delta$                   | 0.17666  | 0.293641     | -103.756317               | 24652.408908 |
